# Supplementary material for: Improving Sleep with Far-Infrared-Emitting Pajamas: A Pilot Randomized Controlled Trial
Source: Int J Environ Res Public Health. 2023 Feb 22;20(5):3870. doi: 10.3390/ijerph20053870 (PMC10002002; doi:10.3390/ijerph20053870)
Supplement: Supplementary file 1 [file ijerph-20-03870-s001.zip › ijerph-1995032-supplementary.pdf]

Table S1. Intervention effects on PSQI across study time points using GEE (adherent participants).

| Time Points | Time effect                        |                               |                                     |                               | Time × group                          |                              |
|-------------|------------------------------------|-------------------------------|-------------------------------------|-------------------------------|---------------------------------------|------------------------------|
|             | FIR pyjamas group ( <i>n</i> = 19) |                               | Sham-pyjamas group ( <i>n</i> = 16) |                               | effect                                | <i>p</i> -value <sup>e</sup> |
|             | Mean (SE) <sup>a</sup>             | <i>Cohen's d</i> <sup>b</sup> | Mean (SE)                           | <i>Cohen's d</i> <sup>b</sup> | <i>d</i> <sub>ppc2</sub> <sup>d</sup> |                              |
|             | Pittsburgh Sleep Quality Index     |                               |                                     |                               |                                       | 0.385                        |
| Baseline    | 9.37 (0.738)                       |                               | 9.13 (0.765)                        |                               |                                       |                              |
| Week 2      | 9.11 (0.849)                       | 0.075                         | 7.31 (0.611)                        | 0.657                         | −0.484                                | 0.089                        |
| Week 4      | 8.28 (0.781)                       | 0.329                         | 6.75 (0.658)                        | 0.834                         | −0.401                                | 0.197                        |
| Week 6      | 8.17 (0.764)                       | 0.367                         | 7.13 (0.499)                        | 0.774                         | −0.248                                | 0.243                        |

Abbreviations: FIR, far infrared; SE, standard error; <sup>a</sup> Estimated mean and standard error (SE) from generalized estimating equations (GEE). <sup>b</sup> Effect size calculation was based on the difference of estimated mean and standard deviation comparing each timepoint and baseline. <sup>c</sup> Effect size calculation was based on the between-group difference in total scores divided by pooled standard deviation. <sup>d</sup> Effect size based on the mean pre-post change in the treatment group minus the mean pre-post change in the control group, divided by the pooled pretest standard deviation (Morris, 2008). <sup>e</sup> *p*-value for group × time interaction of mean score using linear mixed-effects models.
